# Supplementary material
Source: MDPI journal article supplement (https://www.mdpi.com/2073-4395/11/10/2056)
Supplement: s1 [file s1]

**Table S1.** Photosynthetic pigments ratios in the shoots of non-transformed and *AtCKX* transgenic centaury lines after 8 weeks of growth in ½MS medium supplemented with graded NaCl concentration. The data represent the mean ± standard error. Means marked with a different letter significantly different from the control, according to the LSD test ( $p \leq 0.05$ ).

| Centaury Lines   | NaCl Concentration (mM) | <i>Chl a</i> / <i>Chl b</i> Ratio | Total <i>Chl</i> / Total Carotenoid Ratio |
|------------------|-------------------------|-----------------------------------|-------------------------------------------|
| Non-transformed  | 0 NaCl                  | 0.88 ± 0.01 <b>a</b>              | 14.84 ± 8.20 <b>h</b>                     |
|                  | 50 mM NaCl              | 2.13 ± 0.03 <b>b</b>              | 7.61 ± 0.11 <b>g</b>                      |
|                  | 100 mM NaCl             | 3.93 ± 0.04 <b>d</b>              | 2.70 ± 0.04 <b>c</b>                      |
|                  | 150 mM NaCl             | 5.19 ± 0.05 <b>f</b>              | 1.76 ± 0.09 <b>bc</b>                     |
|                  | 200 mM NaCl             | 8.72 ± 0.09 <b>h</b>              | 1.61 ± 0.25 <b>b</b>                      |
| <i>AtCKX1-29</i> | 0 NaCl                  | 0.95 ± 0.01 <b>a</b>              | 18.05 ± 6.91 <b>j</b>                     |
|                  | 50 mM NaCl              | 3.52 ± 0.32 <b>d</b>              | 3.56 ± 0.18 <b>d</b>                      |
|                  | 100 mM NaCl             | 6.60 ± 0.41 <b>g</b>              | 2.39 ± 0.29 <b>c</b>                      |
|                  | 150 mM NaCl             | 5.93 ± 0.41 <b>g</b>              | 1.62 ± 0.27 <b>b</b>                      |
|                  | 200 mM NaCl             | 9.14 ± 0.46 <b>h</b>              | 1.22 ± 0.21 <b>a</b>                      |
| <i>AtCKX2-17</i> | 0 NaCl                  | 2.41 ± 0.23 <b>b</b>              | 5.59 ± 0.23 <b>e</b>                      |
|                  | 50 mM NaCl              | 2.89 ± 0.32 <b>c</b>              | 3.94 ± 0.86 <b>d</b>                      |
|                  | 100 mM NaCl             | 2.98 ± 0.09 <b>c</b>              | 2.10 ± 0.06 <b>c</b>                      |
|                  | 150 mM NaCl             | 3.04 ± 0.64 <b>c</b>              | 1.61 ± 0.15 <b>b</b>                      |
|                  | 200 mM NaCl             | 8.40 ± 0.11 <b>h</b>              | 1.10 ± 0.12 <b>a</b>                      |
| <i>AtCKX2-26</i> | 0 NaCl                  | 0.71 ± 0.03 <b>a</b>              | 16.49 ± 0.29 <b>i</b>                     |
|                  | 50 mM NaCl              | 1.95 ± 0.02 <b>b</b>              | 6.66 ± 0.09 <b>f</b>                      |
|                  | 100 mM NaCl             | 2.88 ± 0.19 <b>c</b>              | 1.50 ± 0.03 <b>ab</b>                     |
|                  | 150 mM NaCl             | 3.67 ± 0.85 <b>d</b>              | 1.44 ± 0.04 <b>ab</b>                     |
|                  | 200 mM NaCl             | 4.45 ± 0.09 <b>e</b>              | 1.30 ± 0.02 <b>a</b>                      |
